# Supplementary material
Source: PubMed Central journal article supplement (PMC6946909)
Supplement: NIHMS1534548-supplement-1.pdf [file NIHMS1534548-supplement-1.pdf]

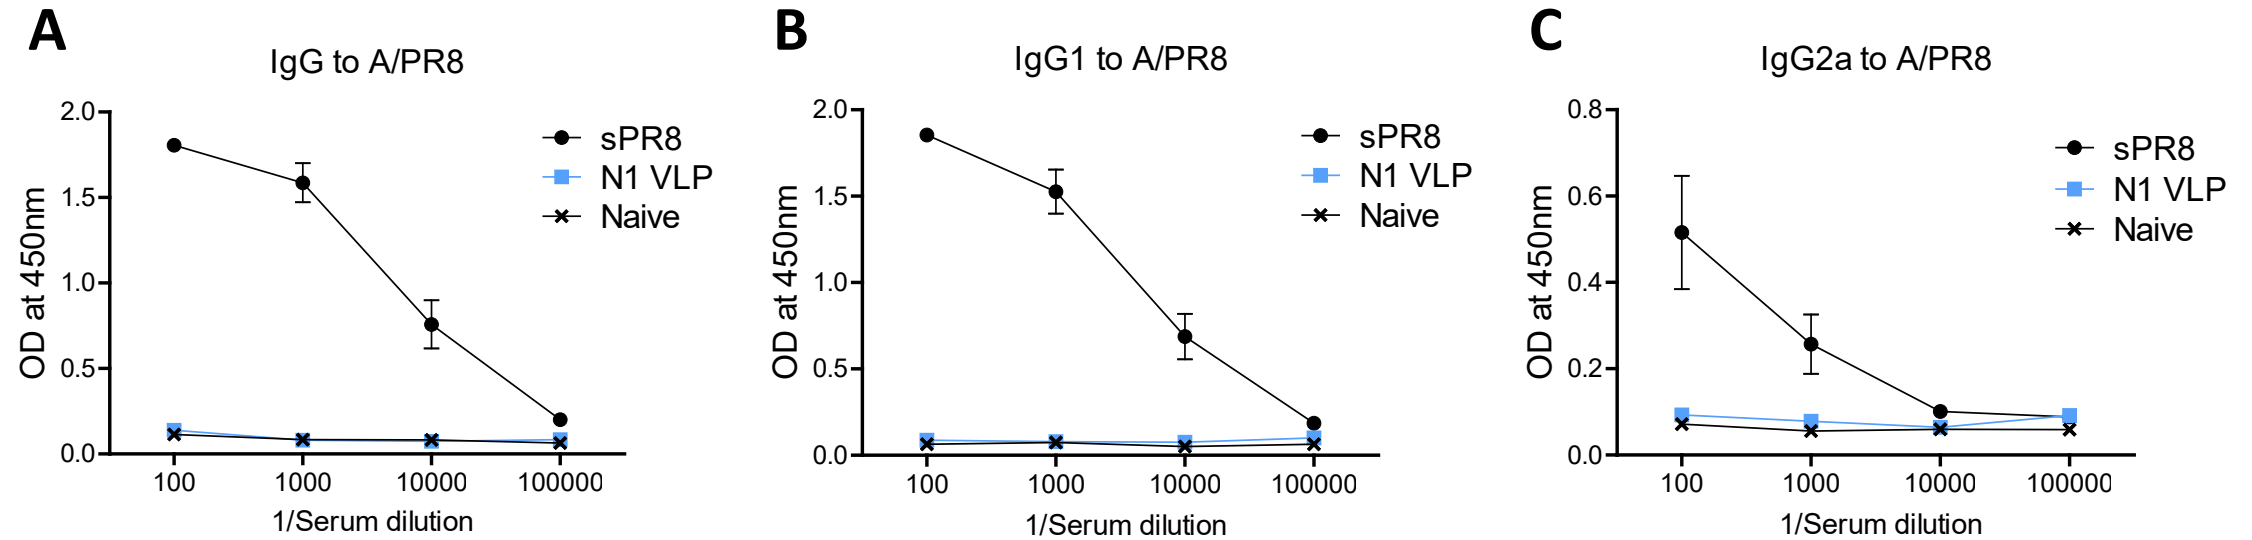

**Supplementary Figure S1. A/PR8-specific antibody responses**

BALB/c mice (n=5-8) were immunized with N1 VLP (10  $\mu$ g) and split vaccine from A/PR8 (sPR8) (1  $\mu$ g HA) intramuscularly with an interval of 2 weeks and blood samples were collected at week 2 after boost. (A-C) Antigen-specific antibodies were determined by ELISA.
